# Supplementary material for: Dynamic analysis of texture and metabolic feature changes in the rectus femoris in patients with sepsis-induced myopathy during the acute phase
Source: Research Square preprint supplement (doi:10.21203/rs.3.rs-6385909/v1), 2025-04-17
Supplement: Supplementary file 1 [file 2683bd97f16b1125679fd3fe.docx]

**Nutritional Therapy and Early Exercise Therapy**

**Nutritional Therapy**

Nutritional therapy for all study subjects was administered based on the **2019 ESPEN ICU Clinical Nutrition Guidelines [15]**, jointly assessed and provided by **intensivists and nutritionists**. The specifics were as follows:

1. **Nutritional therapy was initiated for all ICU patients who remained hospitalized for more than 48 hours.**
2. **Energy requirements were estimated using the following formula [48]:**
   - **Target energy (y) = 199.35 + 1.17 × x**, where **x** represents the **24-hour energy expenditure** predicted by the **Harris-Benedict (HB) equation (Kcal/day).**
   - **HB equation for males:** 66+13.75×(body weight in kg)+5.00×(height in cm)−6.76×(age in years)66 + 13.75 × (\text{body weight in kg}) + 5.00 × (\text{height in cm}) - 6.76 × (\text{age in years})66+13.75×(body weight in kg)+5.00×(height in cm)−6.76×(age in years)
   - **HB equation for females:** 665+9.56×(body weight in kg)+1.85×(height in cm)−4.6×(age in years)665 + 9.56 × (\text{body weight in kg}) + 1.85 × (\text{height in cm}) - 4.6 × (\text{age in years})665+9.56×(body weight in kg)+1.85×(height in cm)−4.6×(age in years)
   - **Stress coefficient adjustments:**
     - Baseline stress coefficient = **100%**
     - **For every 1°C increase in body temperature, the stress coefficient increased by 10%.**
     - **For sepsis or multiple trauma, the stress coefficient increased by 20%.**
     - **For uncorrected septic shock, the stress coefficient increased by 30%.**
3. **Oral feeding was the preferred method for patients able to ingest food.**
4. **Critically ill patients unable to eat orally were started on enteral nutrition (EN) within 48 hours.**
5. **Patients unable to tolerate EN received parenteral nutrition (PN) within 3 to 7 days.**
6. **Severely malnourished patients who could not receive EN were started on PN early and gradually increased to full supply.**
7. **To prevent overfeeding, full-dose EN or PN was avoided in the early phase, with full-dose nutrition reached within 3 to 7 days.**
8. **EN was administered continuously rather than as bolus feeding.**
9. **Gastric feeding was the preferred standard method of EN.**
10. **Patients unable to tolerate gastric feeding and unresponsive to prokinetic agents received post-pyloric enteral feeding.**
11. **Patients at high risk of aspiration were given post-pyloric enteral feeding.**
12. **For patients unable to tolerate gastric feeding, intravenous erythromycin was used as the first-line prokinetic agent.**
13. **Intravenous metoclopramide or a combination of metoclopramide and erythromycin was used if needed.**
14. **Protein intake was targeted at 1.3 g/kg/day.**
15. **Intravenous glucose or enteral carbohydrate supply did not exceed 5 mg/kg/min.**
16. **Intravenous lipid supply did not exceed 1.5 g/kg/day, adjusted based on individual tolerance.**

**Early Exercise Therapy**

Within **24 hours of ICU admission**, **rehabilitation physicians and respiratory therapists** assessed patients and developed individualized **early mobilization plans**, implemented as follows:

1. **Patients with muscle strength ≤ Grade II**:
   - **Passive limb exercises**, **15 repetitions per set, 3 sets per joint, twice daily.**
2. **Patients with muscle strength > Grade II and clear consciousness**:
   - **Resistance training (active-assisted limb exercises), 15 repetitions per set, 3 sets per joint, twice daily.**
   - **Assisted bedside sitting for 20 minutes, once daily.**
3. **For patients without lower limb deep vein thrombosis (confirmed via bedside ultrasound)**:
   - **Transcutaneous neuromuscular electrical stimulation** (HB-SJ3 model, pulse width **300 µs, frequency 40 Hz, output 10 mA**) was applied to stimulate the **bilateral quadriceps muscle bellies for 20 minutes, once daily.**
4. **Respiratory muscle training**:
   - **15 minutes per session, twice daily.**
